# Supplementary material for: Fate of Saxitoxins in Lake Water: Preliminary Testing of Degradation by Microbes and Sunlight
Source: MDPI journal article supplement (doi:10.3390/w14213556), 2022-11-05
Supplement: s1 [file s1]

Archive with 1 entries (1 files):
- water-1971669-supplementary.pdf
