# Supplementary material for: Fate of Saxitoxins in Lake Water: Preliminary Testing of Degradation by Microbes and Sunlight
Source: MDPI journal article supplement (doi:10.3390/w14213556), 2022-11-05
Supplement: s1 [file s1 › water-1971669-supplementary.pdf]

## Supplementary Material

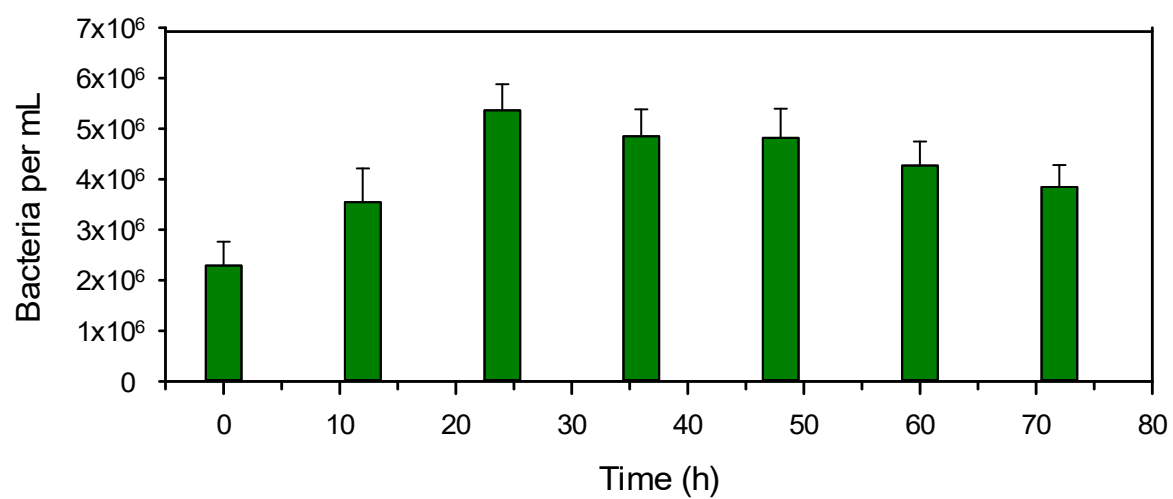

**Figure S1.** Density of bacteria in STX degradation experiment on 28 July 2022. Mean number of bacteria in 10 randomly selected microscope fields  $\pm 1$  STD are shown.

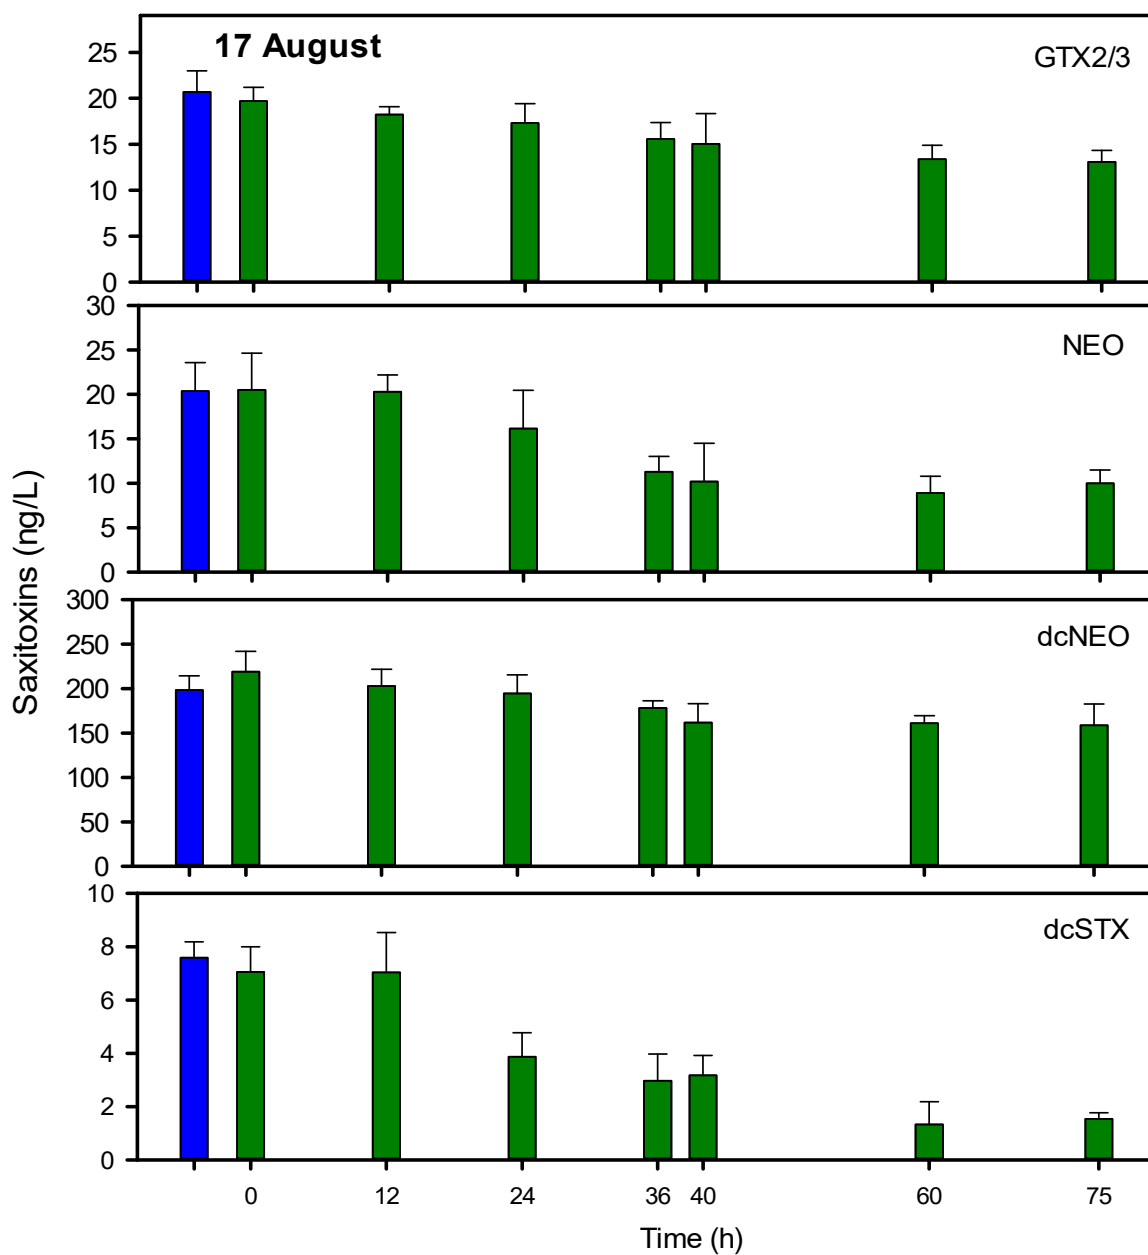

**Figure S2.** Microbial degradation of four different STX analogs determined by HPLC quantification. Lake water was collected on 17 August, 2020. Blue columns represent initial concentration in the lake water. Means  $\pm$  1 STD are shown ( $n = 3$ ).

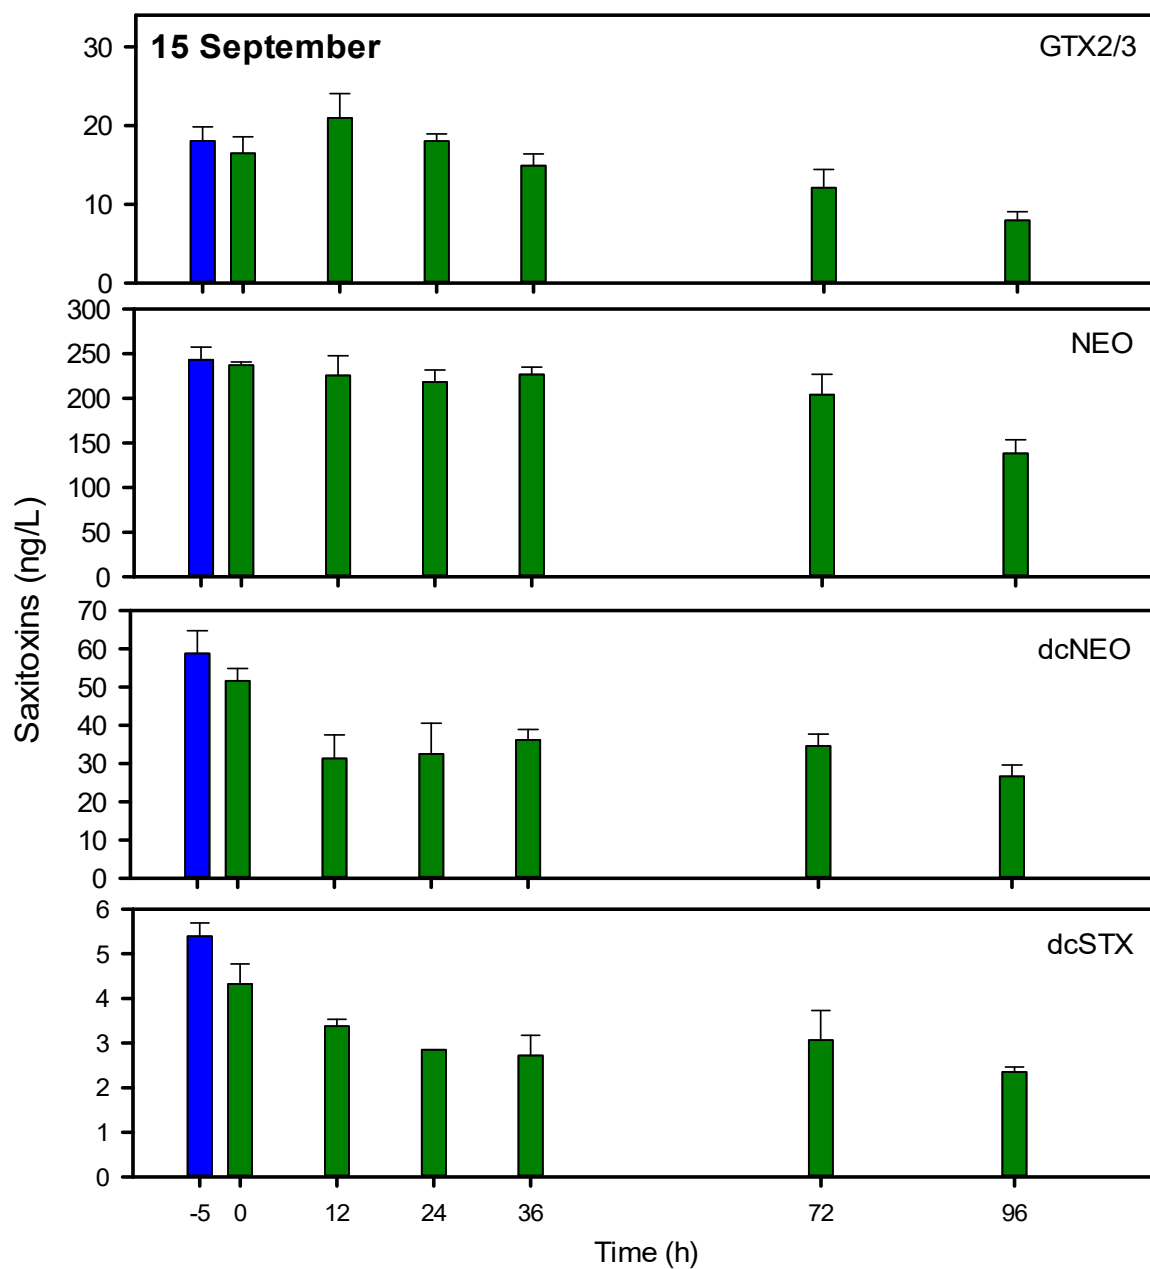

**Figure S3.** Microbial degradation of four different STX analogs determined by HPLC quantification. Lake water was collected on 15 September, 2020. Blue columns represent initial concentration in the lake water. Means  $\pm$  1 STD are shown ( $n = 3$ ).
